# Supplementary material for: Atg8 regulates vacuolar membrane dynamics in a lipidation-independent manner in Pichia pastoris
Source: Oxford University Press journal article supplement (doi:10.1242/jcs.070045), 2010-11-03
Supplement: jcs070045tables1.pdf [file jcs070045tables1.pdf]

**Table S1. Yeast strains used in this study**

| Strain               | Genotype                     | Reference                      |
|----------------------|------------------------------|--------------------------------|
| <i>P. pastoris</i>   |                              |                                |
| PPY12                | <i>arg4 his4</i>             | Sakai <i>et al.</i> (1998)     |
| NTP0101              | PPY12 <i>atg1::Zeof</i>      | This study                     |
| PPM5010              | PPY12 <i>atg8::Zeof</i>      | Mukaiyama <i>et al.</i> (2002) |
| PPM5011              | PPM5010 <i>his4::pHM104</i>  | Mukaiyama <i>et al.</i> (2002) |
| NTP0802              | PPY12 <i>atg7::Zeof</i>      | This study                     |
| NTP0803              | NTP0802 <i>atg8::pHM112</i>  | This study                     |
| NTP0804              | NTP0803 <i>his4::pHM104</i>  | This study                     |
| NTP0801              | PPM5010 <i>his4::pNT801</i>  | This study                     |
| PPM5016              | PPM5010 <i>his4::pHM106</i>  | Mukaiyama <i>et al.</i> (2002) |
| NTP0805              | PPM5030 <i>his4::pHM104</i>  | This study                     |
| PPM5017              | PPM5010 <i>his4::pHM110</i>  | Mukaiyama <i>et al.</i> (2002) |
| NTP0806              | PPM5010 <i>his4::pNT802</i>  | This study                     |
| NTP0807              | PPM5010 <i>his4::pNT803</i>  | This study                     |
| NTP0808              | PPM5010 <i>his4::pNT804</i>  | This study                     |
| NTP0809              | PPM5010 <i>his4::pNT805</i>  | This study                     |
| NTP0810              | PPM5010 <i>his4::pNT806</i>  | This study                     |
| NTP0811              | PPM5010 <i>his4::pNT807</i>  | This study                     |
| NTP0812              | PPM5010 <i>his4::pNT808</i>  | This study                     |
| NTP0813              | NTP0803 <i>his4::pNT802</i>  | This study                     |
| NTP0814              | NTP0803 <i>his4::pNT804</i>  | This study                     |
| NTP0815              | NTP0803 <i>his4::pNT806</i>  | This study                     |
| NTP0816              | NTP0803 <i>his4::pNT807</i>  | This study                     |
| NTP0817              | NTP0803 <i>his4::pNT809</i>  | This study                     |
| NTP0818              | NTP0803 <i>his4::pNT810</i>  | This study                     |
| NTP0819              | NTP0803 <i>his4::pNT811</i>  | This study                     |
| NTP0820              | PPM5010 <i>arg4::pSAP115</i> | This study                     |
| NTP0821              | PPM5010 <i>his4::pNT812</i>  | This study                     |
| NTP0001              | PPY12 <i>arg4::pSAP500</i>   | This study                     |
| NTP0102              | NTP0101 <i>arg4::pSAP500</i> | This study                     |
| NTP0822              | PPM5010 <i>arg4::pSAP500</i> | This study                     |
| NTP0823              | NTP0101 <i>atg8::pHM112</i>  | This study                     |
| NTP0824              | NTP0803 <i>his4::pNT813</i>  | This study                     |
| NTP0825              | NTP0803 <i>his4::pNT814</i>  | This study                     |
| NTP0826              | NTP0803 <i>his4::pNT815</i>  | This study                     |
| NTP0827              | PPM5010 <i>his4::pNT816</i>  | This study                     |
| NTP0828              | PPM5010 <i>his4::pNT817</i>  | This study                     |
| NTP0829              | NTP0828 <i>his4::pNI005</i>  | This study                     |
| <i>S. cerevisiae</i> |                              |                                |
| YMO100               | W303-1A, <i>ADE2</i>         | This study                     |
| YMO101               | YMO100, <i>atg1::SpHIS5</i>  | This study                     |
| YMO107               | YMO100, <i>atg7::SpHIS5</i>  | This study                     |
| YMO108               | YMO100, <i>atg8::SpHIS5</i>  | This study                     |
