# Supplementary material for: Atg8 regulates vacuolar membrane dynamics in a lipidation-independent manner in Pichia pastoris
Source: Oxford University Press journal article supplement (doi:10.1242/jcs.070045), 2010-11-03
Supplement: jcs070045tables2.pdf [file jcs070045tables2.pdf]

**Table S2. Primers used in this study**

| Desination       | DNA Sequence                                                       |
|------------------|--------------------------------------------------------------------|
| ATG8PromFw-EcoRI | 5'-GGAATTCGGATCTAAGGTTACCGCTTTCGAC-3'                              |
| ATG8TFRv-XhoI    | 5'-CCGCTCGAGTTAAAACGTGTTTTCTCCGCTGTAAAG-3'                         |
| ATG8I32AFw       | 5'-GCGGACCGTATCCCCGTGGCTTGTGAGAAAGTGGAGAAG-3'                      |
| ATG8I32ARv       | 5'-CTTCTCCACTTTCTCACAAGCCACGGGGATACGGTCCGC-3'                      |
| ATG8K48AFw       | 5'-CCAGAGGTAGATAAGCGGGCTTACCTGGTTCCATGCGACC-3'                     |
| ATG8K48ARv       | 5'-GGTCGCATGGAACCAGGTAAGCCCGCTTATCTACCTCTGG-3'                     |
| ATG8L50AFw       | 5'-GGTAGATAAGCGGAAGTACGCTGTTCCATGCGACCTAACTG-3'                    |
| ATG8L50ARv       | 5'-CAGTTAGGTCGCATGGAACAGCGTACTTCCGCTTATCTACC-3'                    |
| ATG8V61AFw       | 5'-CTAACTGTGGGCCAGTTTGTGGCTGTTATCCGAAAGAGAATTAAG-3'                |
| ATG8V61ARv       | 5'-CTTAATTCTCTTTCCGATAACAGCCACAAACTGGCCCACAGTTAGGA-3'              |
| ATG8R65AFw       | 5'-GGGCCAGTTTGTGTACGTTATCGCTAAGAGAATTAAGATCCCATCTG-3'              |
| ATG8R65ARv       | 5'-CAGATGGGATCTTAATTCTCTTAGCGATAACGTACACAAACTGGCCC-3'              |
| ATG8F104AFw      | 5'-AGAACATAAAGATGAGGACGGGGCTTGTACGTTCTTTACAGCGGAG-3'               |
| ATG8F104ARv      | 5'-CTCCGCTGTAAAGAACGTACAAAGCCCCGTCCTCATCTTTATGTTCT-3'              |
| ATG8Y106AFw      | 5'-GATGAGGACGGGTTTTTGGCTGTTCTTTACAGCGGAGAAAAC-3'                   |
| ATG8Y106ARv      | 5'-GTTTTCTCCGCTGTAAAGAACAGCCAAAACCCGTCCTCATC-3'                    |
| HAFw-EcoRI       | 5'-GGAATTCATGTCTAGATCTATCTTTTACCCATAC-3'                           |
| ATG8FGRv-XhoI    | 5'-CCGCTCGAGTTATCCAAACGTGTTTTCTCCGCTGTA-3'                         |
| ATG8A9Rv-XhoI    | 5'-CCGCTCGAGTTAAGCAGCAGCAGCAGCAGCAGCAGCTCCAAACGTGTTTTCTCCGCTGTA-3' |
| CFPFw-PstI       | 5'-AACTGCAGATGGTGAGCAAGGGCGAGGAGC-3'                               |
| CFPRv-PstI       | 5'-AACTGCAGCTTGTACAGCTCGTCCATGCC-3'                                |
| YFPFw-HindIII    | 5'-CCCAAGCTTGTGAGCAAGGGCGAGGAG-3'                                  |
| YFPRv-HindIII    | 5'-CCCAAGCTTTTACTTGTACAGCTCGTCCAT-3'                               |
| ATG17UPFw-BamHI  | 5'-CGGGATCCTCATGTAGACCTACAGAGGCCATG-3'                             |
| ATG17Rv-XhoI     | 5'-CCGCTCGAGCTTCTTCCAGTATTGCAATGCGT-3'                             |
