# Supplementary material for: Atg8 regulates vacuolar membrane dynamics in a lipidation-independent manner in Pichia pastoris
Source: Oxford University Press journal article supplement (doi:10.1242/jcs.070045), 2010-11-03
Supplement: jcs070045tables3.pdf [file jcs070045tables3.pdf]

**Table S3. Plasmids used in this study**

| Desination | Discription                   | Reference                      |
|------------|-------------------------------|--------------------------------|
| pHM104     | HA-PpATG8 HIS4                | Mukaiyama <i>et al.</i> (2002) |
| pHM106     | HA-PpATG8FG HIS4              | Mukaiyama <i>et al.</i> (2002) |
| pHM110     | HA-PpATG8G116A HIS4           | Mukaiyama <i>et al.</i> (2002) |
| pPM112     | $\Delta$ Ppatg8               | Mukaiyama <i>et al.</i> (2004) |
| pSAP115    | YFP-PpATG8 ARG4               | Mukaiyama <i>et al.</i> (2004) |
| pSAP500    | SK-ARG4 ARG4                  | Ano <i>et al.</i> (2004)       |
| pNT801     | HA-PpATG8FT HIS4              | This study                     |
| pNT802     | HA-PpATG8I32A HIS4            | This study                     |
| pNT803     | HA-PpATG8K48A HIS4            | This study                     |
| pNT804     | HA-PpATG8L50A HIS4            | This study                     |
| pNT805     | HA-PpATG8V61A HIS4            | This study                     |
| pNT806     | HA-PpATG8R65A HIS4            | This study                     |
| pNT807     | HA-PpATG8F104A HIS4           | This study                     |
| pNT808     | HA-PpATG8Y106A HIS4           | This study                     |
| pNT809     | PGAPDHA-HA-PpATG8FG HIS4      | This study                     |
| pNT810     | PGAPDHA-HA-PpATG8FGR65A HIS4  | This study                     |
| pNT811     | PGAPDHA-HA-PpATG8FGF104A HIS4 | This study                     |
| pNT812     | PATG8YFP-PpATG8 HIS4          | This study                     |
| pNT813     | PATG8YFP-PpATG8R65A HIS4      | This study                     |
| pNT814     | PATG8YFP-PpATG8F104A HIS4     | This study                     |
| pNT815     | PATG8YFP-PpATG8G116A HIS4     | This study                     |
| pNT816     | HA-PpATG8A9 HIS4              | This study                     |
| pNT817     | CFP-PpATG8 HIS4               | This study                     |
| pNT204     | PIB1ARG4                      | This study                     |
| pNT205     | YFP-PIB1ARG4                  | This study                     |
| pNI005     | PATG17PpATG17-YFP ARG4        | This study                     |
